# Supplementary material for: Iron distribution through the developmental stages of Medicago truncatula nodules
Source: Royal Society of Chemistry journal article supplement (doi:10.1039/c3mt00060e), 2013-01-01
Supplement: c3mt00060e.pdf [file c3mt00060e.pdf]

# SUPPLEMENTARY FIGURE 1

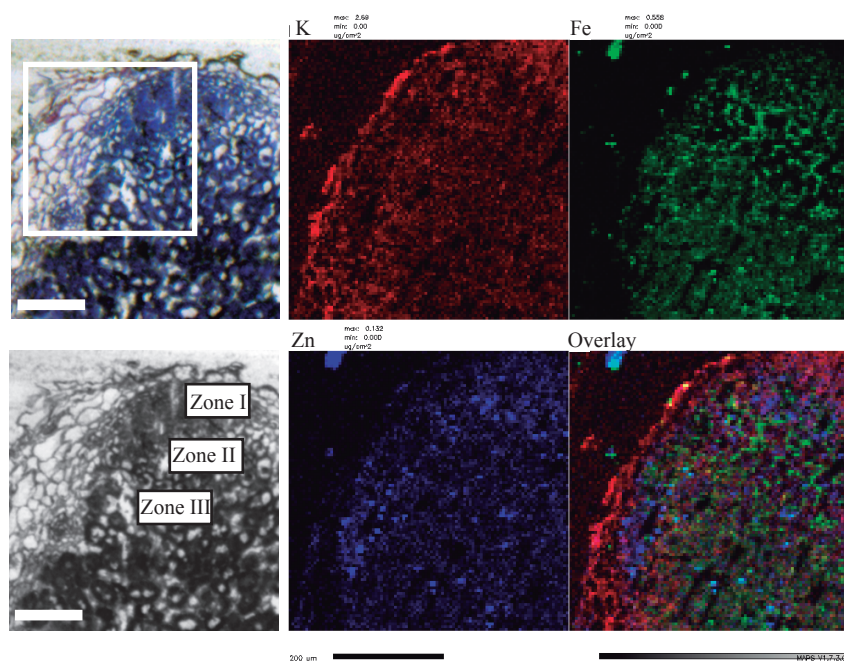

Suppl. Fig. 1. Overview of K, Fe and Zn distribution in a *M. truncatula* nodule. Cross section of nodule stained with toluidine blue (upper left panel) and diagram of the different nodule regions (lower left panel). Scale bars indicate 200  $\mu\text{m}$ . The boxed region was analysed by S-XRF at beamline 8-BM-B. Potassium is indicated in red, iron in green and zinc in blue (middle and right squares). Bar indicates 200  $\mu\text{m}$ .

## SUPPLEMENTARY FIGURE 2

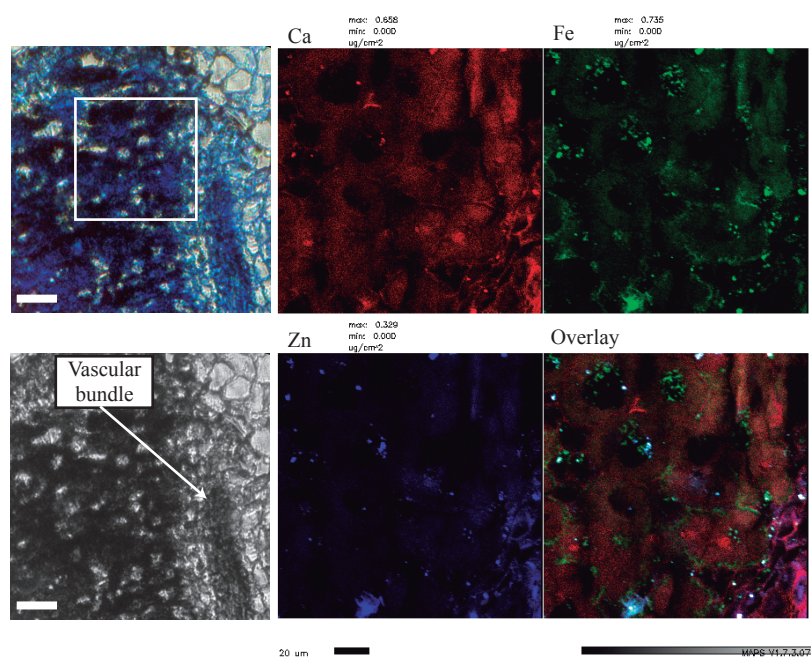

Suppl. Fig. 2. Ca, Fe and Zn distribution in early zone III of *M. truncatula* nodule. Cross section of nodule stained with toluidine blue (upper left panel) and diagram of the different nodule regions (lower left panel). Scale bars indicate 50 µm. The boxed region was analysed by S-XRF at beamline 2-ID-E. Calcium is indicated in red, iron in green and zinc in blue (middle and right panels). Scale bar indicates 20 µm.

# SUPPLEMENTARY FIGURE 3

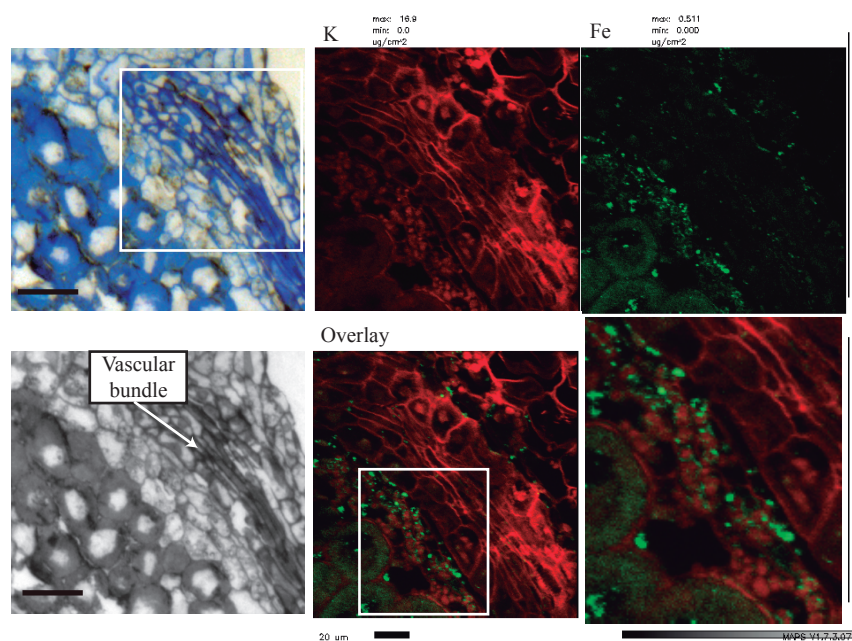

Suppl. Fig. 3. K and Fe distribution in zone III of *M. truncatula* nodule. Cross section of nodule stained with toluidine blue (upper left panel) and diagram of the different nodule regions (lower left panel). Scale bars indicate 50  $\mu\text{m}$ . The boxed region was analysed by S-XRF at beamline 2-ID-E. Potassium is indicated in red and iron in green (upper middle and right panels). The lower right panel is a detail of the overlay composition panel to its left. Scale bar indicates 20  $\mu\text{m}$ .



# SUPPLEMENTARY FIGURE 4

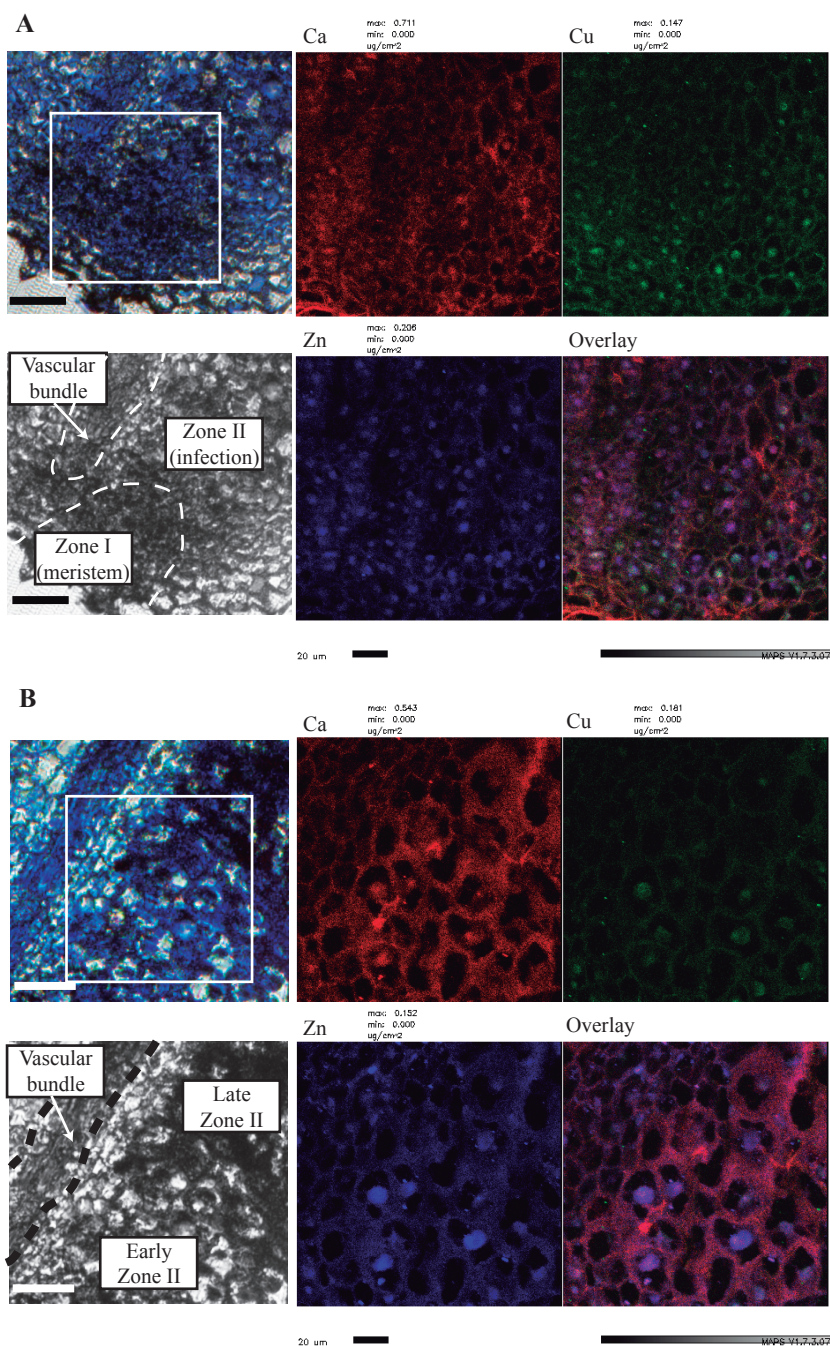

Suppl. Fig. 4. (A) Ca, Cu and Zn distribution in zone I and early zone II and late zone II (B) of *M. truncatula* nodule. Cross section of nodule stained with toluidine blue (upper left panels) and diagram of the different nodule regions (lower left panels). Scale bars indicate 50 µm. The boxed region was analysed by S-XRF at beamline 2-ID-E. Calcium is indicated in red, copper in green and zinc in blue (middle and right panels). Scale bar indicates 20 µm
